# Supplementary material for: Hydrogen sulfide (H2S) emission control by aerobic sulfate reduction in landfill
Source: PubMed Central journal article supplement (PMC5133566; doi:10.1038/srep38103), 2016-12-02
Supplement: srep38103-s1.pdf [file srep38103-s1.pdf]

## **SUPPORTING INFORMATION**

### **Hydrogen sulfide (H<sub>2</sub>S) emission control by aerobic sulfate reduction in landfill**

Yuyang Long\*, Yuan Fang, Dongsheng Shen, Huajun Feng\*, Ting Chen

*Zhejiang Provincial Key Laboratory of Solid Waste Treatment and Recycling, School  
of Environmental Science and Engineering, Zhejiang Gongshang University,  
Hangzhou, 310018, China*

---

\*Corresponding author.

Tel: +86 571 88832369; fax: +86 571 88832369

Email address: [longyy@zjgsu.edu.cn](mailto:longyy@zjgsu.edu.cn) (Y.-Y. Long); [fenghuajun@mail.zjgsu.edu.cn](mailto:fenghuajun@mail.zjgsu.edu.cn) (H.-J. Feng)

Fig. S1 Schematic diagram of simulated landfill systems (1. Leachate outlet 2. Leachate collection tank 3. Gravel layer 4. Landfill site 5. Sampling ports 6. Sandy layer 7. Headspace 8. Gas outlet 9. Leachate recirculation tank 10. Peristaltic pump 11. Leachate distribution system 12. Center vent pipe 13. Inlet)

Fig. S2 Accumulated amount of sulfate leached out from simulated landfills

Fig. S3 Accumulated amount of sulfide leached out from simulated landfills

Fig. S4 Canonical correspondence analysis of microbial communities (Samples are labeled in black; blue vectors indicate the effect of environment parameters on sample community outcomes; red taxa indicate the average CCA location of the sulfur-metabolizing bacterial genus) (P=0.001)

Table S1 The numbers of samples

Table S2 Changes of elemental sulfur content in each layer of simulated landfill (mg kg<sup>-1</sup>)

Table S3 Changes of thiosulfate content in each layer of simulated landfill (mg kg<sup>-1</sup>)

Table S4 The total relative abundances of SRB and SOB (%)

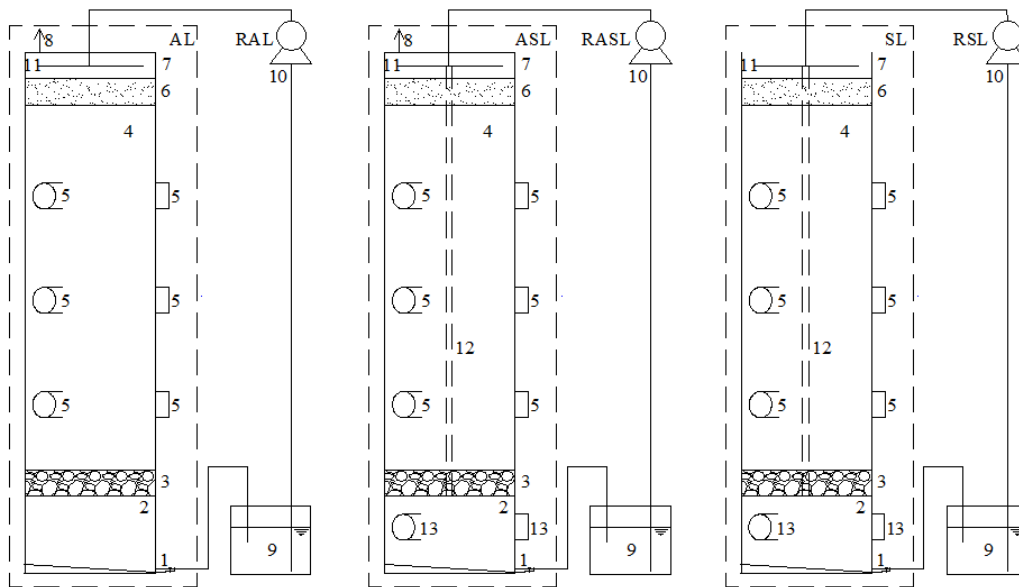

**Fig. S1 Schematic diagram of simulated landfill systems (1. Leachate outlet 2. Leachate collection tank 3. Gravel layer 4. Landfill site 5. Sampling ports 6. Sandy layer 7. Headspace 8. Gas outlet 9. Leachate recirculation tank 10. Peristaltic pump 11. Leachate distribution system 12. Center vent pipe 13. Inlet)**

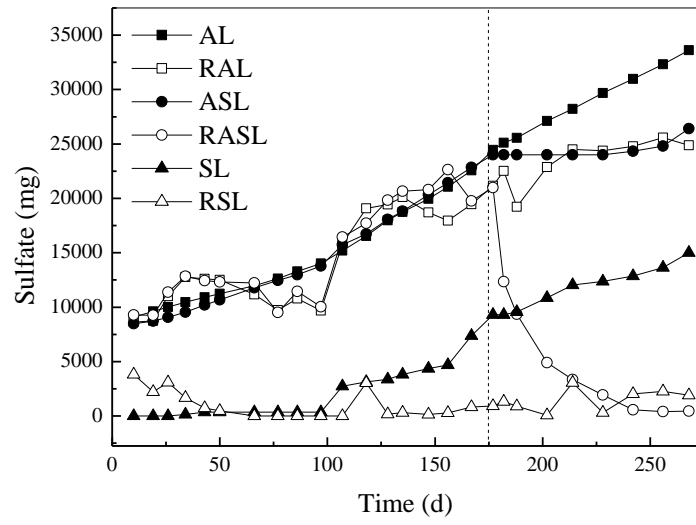

**Fig. S2 Accumulated amount of sulfate leached out from simulated landfills**

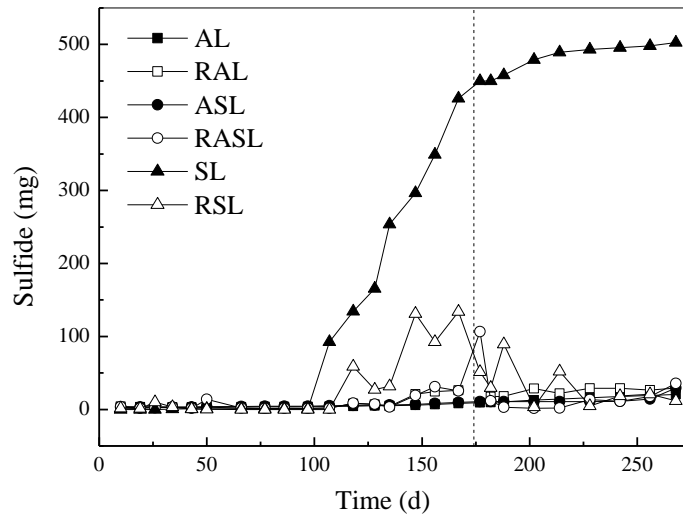

**Fig. S3 Accumulated amount of sulfide leached out from simulated landfills**

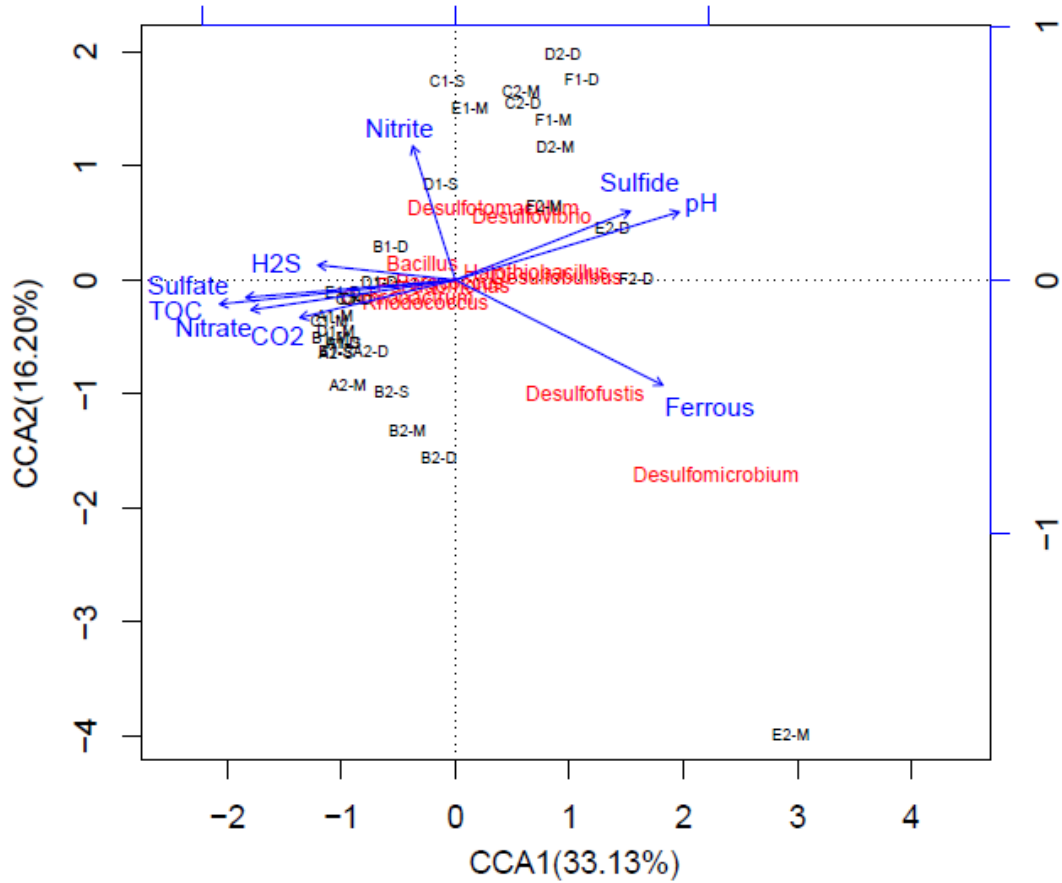

**Fig. S4 Canonical correspondence analysis of microbial communities (Samples are labeled in black; blue vectors indicate the effect of environment parameters on sample community outcomes; red taxa indicate the average CCA location of the sulfur-metabolizing bacterial genus) (P=0.001)**

**Table S1 The numbers of samples**

|      |         | 0 d  | 191 d | 269 d |
|------|---------|------|-------|-------|
| AL   | Shallow | CK   | A1-S  | A2-S  |
|      | Middle  |      | A1-M  | A2-M  |
|      | Deep    |      | A1-D  | A2-D  |
| RAL  | Shallow |      | B1-S  | B2-S  |
|      | Middle  |      | B1-M  | B2-M  |
|      | Deep    |      | B1-D  | B2-D  |
| ASL  | Shallow |      | C1-S  | /     |
|      | Middle  |      | C1-M  | C2-M  |
|      | Deep    |      | C1-D  | C2-D  |
| RASL | Shallow |      | D1-S  | /     |
|      | Middle  |      | D1-M  | D2-M  |
|      | Deep    |      | D1-D  | D2-D  |
| SL   | Shallow |      | /     | /     |
|      | Middle  |      | E1-M  | E2-M  |
|      | Deep    |      | E1-D  | E2-D  |
| RSL  | Shallow | /    | /     |       |
|      | Middle  | F1-M | F2-M  |       |
|      | Deep    | F1-D | F2-D  |       |

“/” indicated that the samples were not collected.

**Table S2 Changes of elemental sulfur content in each layer of simulated landfill (mg kg-1)**

|      | Time (d) | 67    | 89     | 110    | 138     | 159     | 191    | 223      | 269      |
|------|----------|-------|--------|--------|---------|---------|--------|----------|----------|
| AL   | Shallow  | N.D.  | N.D.   | N.D.   | N.D.    | N.D.    | N.D.   | N.D.     | N.D.     |
|      | Middle   | N.D.  | N.D.   | N.D.   | N.D.    | N.D.    | N.D.   | N.D.     | N.D.     |
|      | Deep     | N.D.  | N.D.   | N.D.   | N.D.    | N.D.    | N.D.   | N.D.     | N.D.     |
| RAL  | Shallow  | N.D.  | N.D.   | N.D.   | N.D.    | N.D.    | N.D.   | N.D.     | N.D.     |
|      | Middle   | N.D.  | N.D.   | N.D.   | N.D.    | N.D.    | N.D.   | N.D.     | N.D.     |
|      | Deep     | N.D.  | N.D.   | N.D.   | N.D.    | N.D.    | N.D.   | N.D.     | N.D.     |
| ASL  | Shallow  | N.D.  | N.D.   | N.D.   | N.D.    | N.D.    | 53±2   | 628±74   | /        |
|      | Middle   | N.D.  | N.D.   | N.D.   | N.D.    | N.D.    | 18±2   | 30±3     | 437±76   |
|      | Deep     | N.D.  | N.D.   | N.D.   | N.D.    | N.D.    | 39±3   | 208±5    | 1264±155 |
| RASL | Shallow  | N.D.  | N.D.   | N.D.   | N.D.    | N.D.    | 82±5   | 1539±70  | /        |
|      | Middle   | N.D.  | N.D.   | N.D.   | N.D.    | N.D.    | 21±4   | 143±16   | 318±3    |
|      | Deep     | N.D.  | N.D.   | N.D.   | N.D.    | N.D.    | 61±3   | 352±49   | 1680±153 |
| SL   | Shallow  | 204±1 | 681±12 | 842±62 | 755±47  | 700±39  | /      | /        | /        |
|      | Middle   | N.D.  | N.D.   | N.D.   | N.D.    | N.D.    | 33±2   | 1065±88  | 621±63   |
|      | Deep     | N.D.  | N.D.   | 44±1   | N.D.    | N.D.    | 93±1   | 1568±176 | 1447±184 |
| RSL  | Shallow  | N.D.  | N.D.   | 730±18 | 870±113 | 863±43  | /      | /        | /        |
|      | Middle   | N.D.  | N.D.   | N.D.   | N.D.    | N.D.    | N.D.   | 602±14   | 914±63   |
|      | Deep     | N.D.  | N.D.   | N.D.   | 264±24  | 1007±54 | 657±19 | 933±40   | 2099±36  |

“/” indicated that the samples were not collected.

“N.D.” indicated “not detected”.



**Table S3 Changes of thiosulfate content in each layer of simulated landfill (mg kg-1)**

|      | Time (d) | 89     | 110   | 138    | 159   | 191   | 223    | 269    |
|------|----------|--------|-------|--------|-------|-------|--------|--------|
| AL   | Shallow  | N.D.   | N.D.  | N.D.   | N.D.  | N.D.  | N.D.   | N.D.   |
|      | Middle   | N.D.   | N.D.  | N.D.   | N.D.  | N.D.  | N.D.   | N.D.   |
|      | Deep     | N.D.   | N.D.  | N.D.   | N.D.  | N.D.  | N.D.   | N.D.   |
| RAL  | Shallow  | N.D.   | N.D.  | N.D.   | N.D.  | N.D.  | N.D.   | N.D.   |
|      | Middle   | N.D.   | N.D.  | N.D.   | N.D.  | N.D.  | N.D.   | N.D.   |
|      | Deep     | N.D.   | N.D.  | N.D.   | N.D.  | N.D.  | N.D.   | N.D.   |
| ASL  | Shallow  | N.D.   | N.D.  | N.D.   | N.D.  | N.D.  | N.D.   | /      |
|      | Middle   | N.D.   | N.D.  | N.D.   | N.D.  | N.D.  | N.D.   | N.D.   |
|      | Deep     | N.D.   | N.D.  | N.D.   | N.D.  | N.D.  | N.D.   | N.D.   |
| RASL | Shallow  | N.D.   | N.D.  | N.D.   | N.D.  | N.D.  | N.D.   | /      |
|      | Middle   | N.D.   | N.D.  | N.D.   | N.D.  | N.D.  | N.D.   | N.D.   |
|      | Deep     | N.D.   | N.D.  | N.D.   | N.D.  | N.D.  | N.D.   | N.D.   |
| SL   | Shallow  | 136±10 | 69±3  | 233±18 | 99±1  | /     | /      | /      |
|      | Middle   | N.D.   | 66±1  | N.D.   | N.D.  | N.D.  | N.D.   | N.D.   |
|      | Deep     | N.D.   | 203±9 | N.D.   | N.D.  | N.D.  | N.D.   | 105±6  |
| RSL  | Shallow  | N.D.   | 204±6 | 301±10 | 145±9 | /     | /      | /      |
|      | Middle   | N.D.   | N.D.  | N.D.   | N.D.  | 170±5 | 399±13 | N.D.   |
|      | Deep     | N.D.   | 80±2  | 275±2  | 212±1 | 273±9 | 252±2  | 270±40 |

“/” indicated that the samples were not collected.

“N.D.” indicated “under detected”.

**Table S4 The total relative abundances of SRB and SOB (%)**

|      |         | SRB   |       |       | SOB   |        |        |
|------|---------|-------|-------|-------|-------|--------|--------|
|      |         | 0 d   | 191 d | 269 d | 0 d   | 191 d  | 269 d  |
| AL   | Shallow |       | 0.003 | 0.000 |       | 2.385  | 43.812 |
|      | Middle  |       | 0.007 | 0.003 |       | 5.483  | 48.887 |
|      | Deep    |       | 0.003 | 0.010 |       | 5.266  | 53.648 |
| RAL  | Shallow |       | 0.003 | 0.010 |       | 1.528  | 33.195 |
|      | Middle  |       | 0.003 | 0.021 |       | 3.911  | 38.283 |
|      | Deep    |       | 0.023 | 0.042 |       | 2.984  | 42.914 |
| ASL  | Shallow |       | 0.228 | /     |       | 10.701 | /      |
|      | Middle  |       | 0.002 | 0.154 |       | 1.679  | 3.169  |
|      | Deep    | 0.003 | 0.005 | 0.151 | 6.944 | 1.399  | 6.135  |
| RASL | Shallow |       | 0.034 | /     |       | 0.404  | /      |
|      | Middle  |       | 0.003 | 0.375 |       | 2.015  | 12.580 |
|      | Deep    |       | 0.014 | 0.355 |       | 2.260  | 2.515  |
| SL   | Shallow |       | /     | /     |       | /      | /      |
|      | Middle  |       | 0.253 | 1.102 |       | 1.473  | 5.449  |
|      | Deep    |       | 0.021 | 0.766 |       | 5.241  | 5.924  |
| RSL  | Shallow |       | /     | /     |       | /      | /      |
|      | Middle  |       | 0.251 | 0.198 |       | 0.225  | 4.147  |
|      | Deep    |       | 0.615 | 0.243 |       | 1.050  | 2.423  |

“/” indicated that the samples were not collected.
